# Supplementary material for: Tailoring a multifunctional polyglutamic acid–tragacanth gum binder for enhancing the lithium storage performance of red phosphorus anodes
Source: Royal Society of Chemistry journal article supplement (doi:10.1039/d4mh01615g), 2025-01-01
Supplement: d4mh01615g1.pdf [file d4mh01615g1.pdf]

# **Tailoring a Multifunctional Poly Glutamic Acid-Tragacanth Gum Binder for Enhancing the Lithium Storage Performance of Red Phosphorus Anode**

*Yanting Li,<sup>1</sup> Bin Zhang,<sup>\*3</sup> Moyuan Cao,<sup>4</sup> Xu Liang,<sup>1</sup> Kar Ban Tan,<sup>5</sup> Shaojie Zhang,<sup>1</sup>  
Yidian Dong,<sup>1</sup> Yujie Wang,<sup>1</sup> Yiming Zhang,<sup>1</sup> Haochen Gong,<sup>1</sup> Hui Rong,<sup>1</sup> Anjie Dong,<sup>1</sup>  
Xinpeng Han,<sup>1</sup> Fengmin Jin,<sup>\*1</sup> Jie Sun<sup>\*,1,2</sup>*

<sup>1</sup>School of Chemical Engineering and Technology, Tianjin University, Tianjin, 300350, China.

<sup>2</sup>Quzhou Institute for Innovation in Resource Chemical Engineering, Zhejiang 324000, China.

<sup>3</sup>Beijing Guxin Energy Technology Company, Beijing, 100160, China.

<sup>4</sup>School of Materials Science and Engineering, Nankai University, Tianjin, 300350, China.

<sup>5</sup>Department of Chemistry, Faculty of Science, Universiti Putra Malaysia, 43400 UPM, Serdang, Malaysia

Corresponding Author: Bin Zhang, Email: [791655369@qq.com](mailto:791655369@qq.com); Fengmin Jin, Email: [fmjin@tju.edu.cn](mailto:fmjin@tju.edu.cn); Jie Sun, Email: [sunjie\\_0023@163.com](mailto:sunjie_0023@163.com)

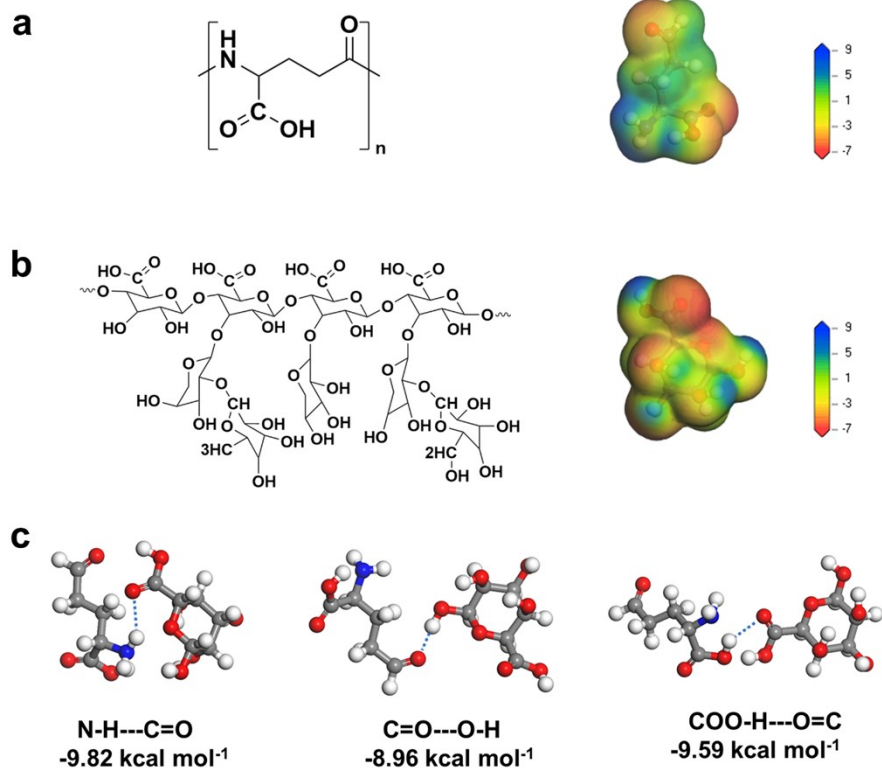

**Figure S1.** The molecular structure and electrostatic potential of PGA a) and TG b). c) The intermolecular hydrogen-bond type and bond energies calculated by DFT simulations.

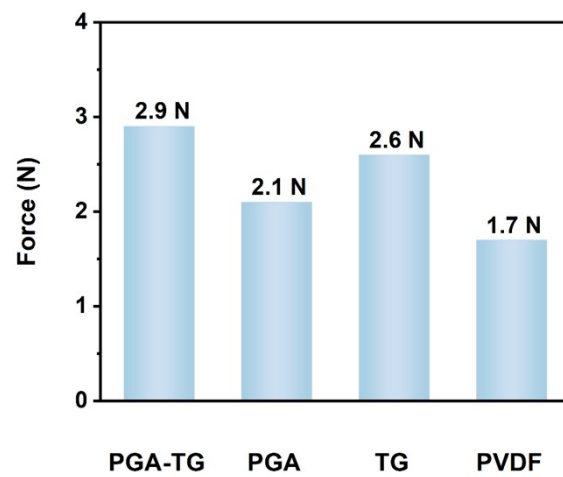

**Figure S2.** The average peeling forces of PGA-TG, PGA, TG, PVDF-based electrodes.

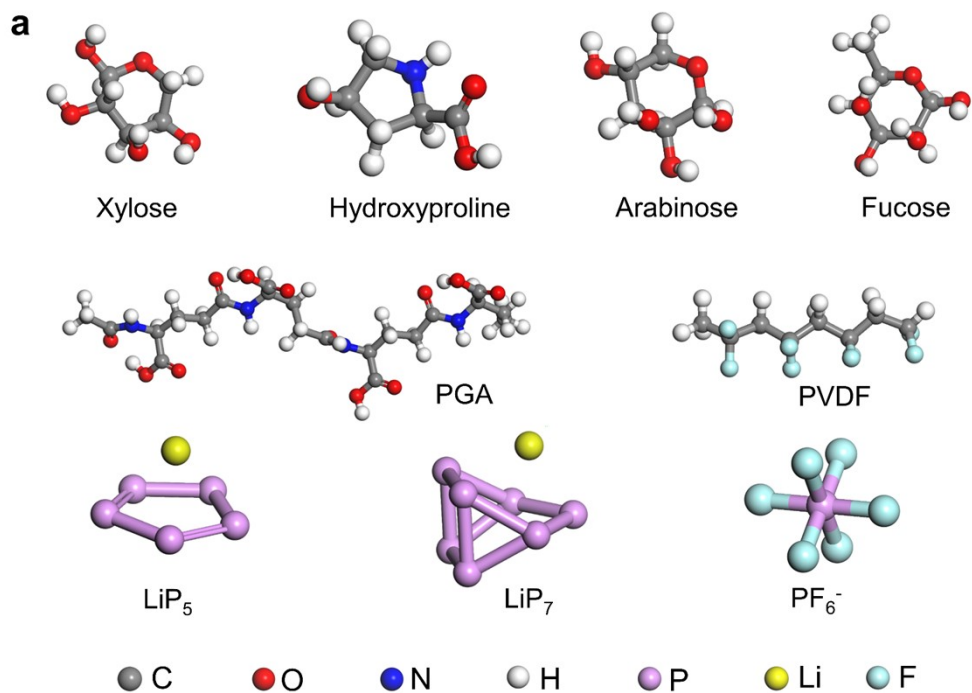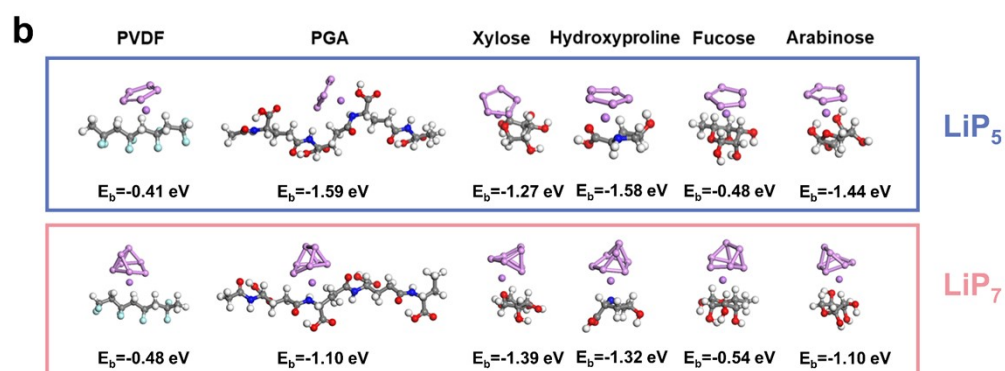

**Figure S3.** a) Species used in theoretical calculations. b) The adsorption conformations and calculated binding energy between different binder and LiP<sub>5</sub>, LiP<sub>7</sub>.

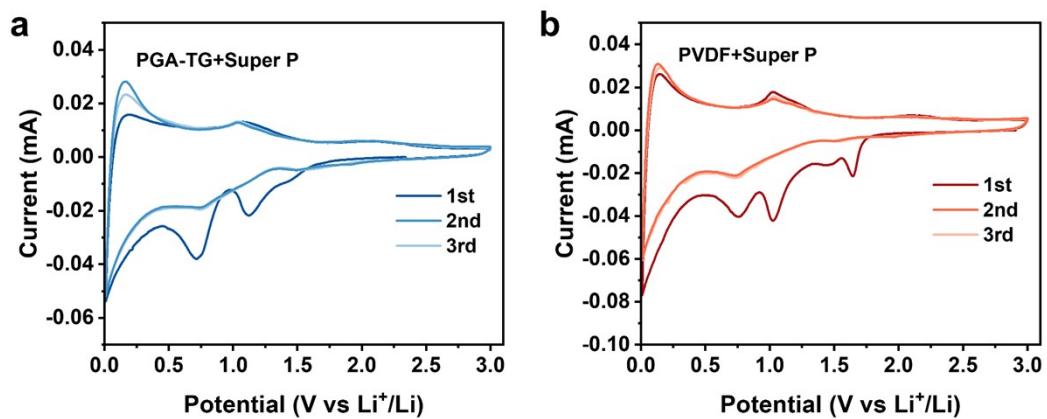

**Figure S4.** CV curves of PGA/TG-Super P a) and PVDF-Super P b) electrode at a scan rate of 0.1 mV s<sup>-1</sup> between 0.01 and 3.0 V vs Li<sup>+</sup>/Li.

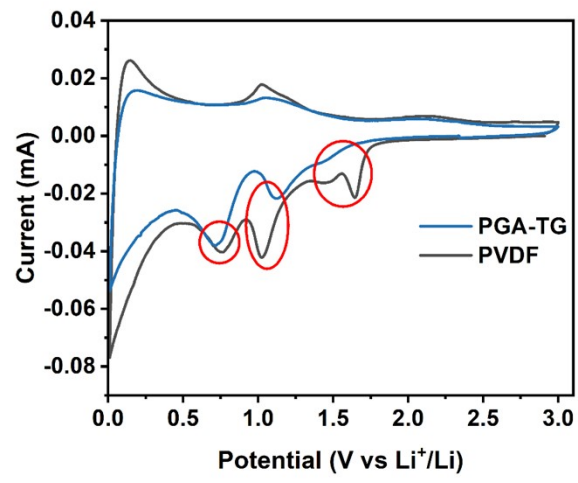

**Figure S5.** The first cycle CV curves of PGA/TG-Super P and PVDF-Super P electrode.

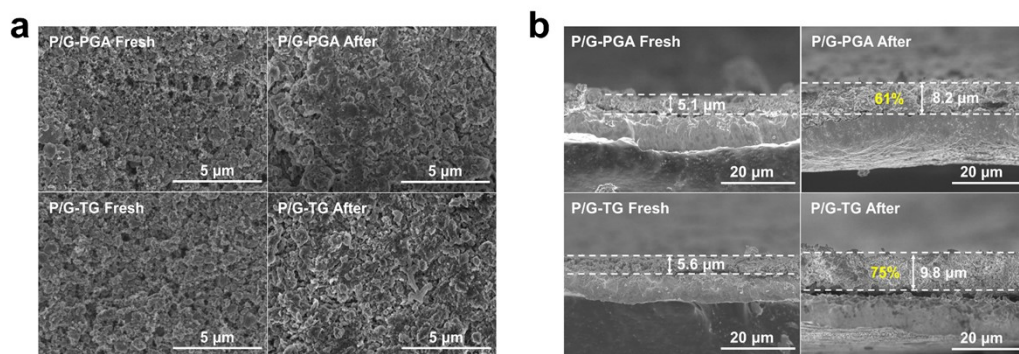

**Figure S6.** a) Top view and b) cross section morphologies of PGA electrode and TG electrode.

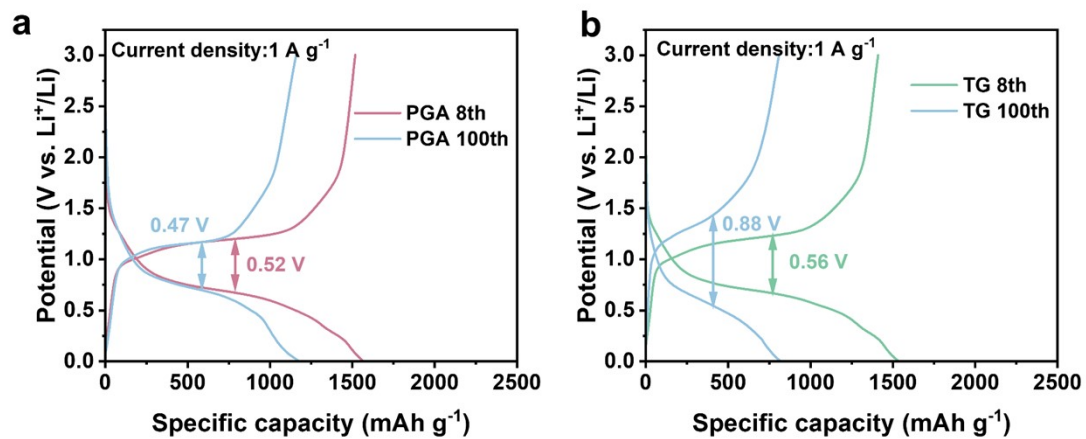

**Figure S7.** Galvanostatic charge and discharge curves of a) PGA electrode and b) TG electrode at  $1 \text{ A g}^{-1}$ .



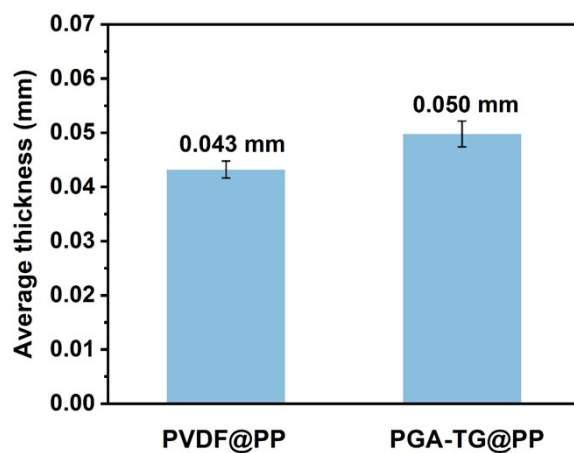

**Figure S8.** The average thickness of PGA-TG@PP and PVDF@PP.

**Table S1.** Summary of the Li<sup>+</sup> conductivity of PGA-TG and PVDF tested from Li-Li and steel-steel symmetric cells.

|               | Ion conductivity<br>(10 <sup>-3</sup> S cm <sup>-1</sup> ) | t <sub>Li+</sub> | Lithium ion<br>conductivity<br>(10 <sup>-3</sup> S cm <sup>-1</sup> ) |
|---------------|------------------------------------------------------------|------------------|-----------------------------------------------------------------------|
| <b>PGA-TG</b> | 1.23                                                       | 0.529            | 0.65                                                                  |
| <b>PVDF</b>   | 1.41                                                       | 0.287            | 0.40                                                                  |

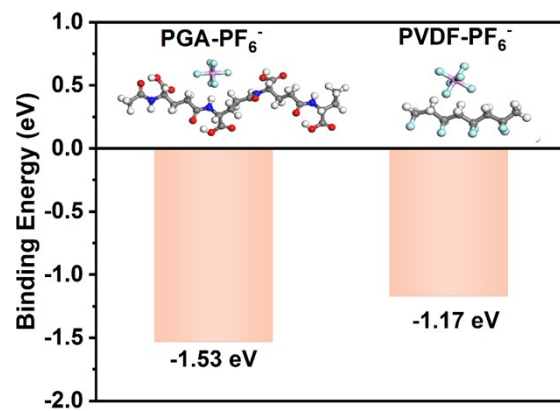

**Figure S9.** The adsorption ability of  $\text{PF}_6^-$  on PGA-TG and PVDF.
